# Supplementary material for: Interaction of ethene and ethyne with bare and hydrogenated Ir4 clusters. A density functional study
Source: Royal Society of Chemistry journal article supplement (doi:10.1039/c1cy00114k), 2011-01-01
Supplement: c1cy00114k.pdf [file c1cy00114k.pdf]

## Electronic Supplementary Information (ESI)

### Interaction of Ethene and Ethyne with Bare and Hydrogenated Ir<sub>4</sub> Clusters. A Density Functional Study

Galina P. Petrova,<sup>1</sup> Georgi N. Vayssilov,<sup>1\*</sup> and Notker Rösch<sup>2\*</sup>

<sup>1</sup> *Faculty of Chemistry, University of Sofia, 1126 Sofia, Bulgaria,  
e-mail: gnv@chem.uni-sofia.bg*

<sup>2</sup> *Department Chemie, Technische Universität München, 85747 Garching, Germany,  
e-mail: roesch@ch.tum.de*

## S1. Ethene / ethyne adsorption on hydrogenated iridium clusters

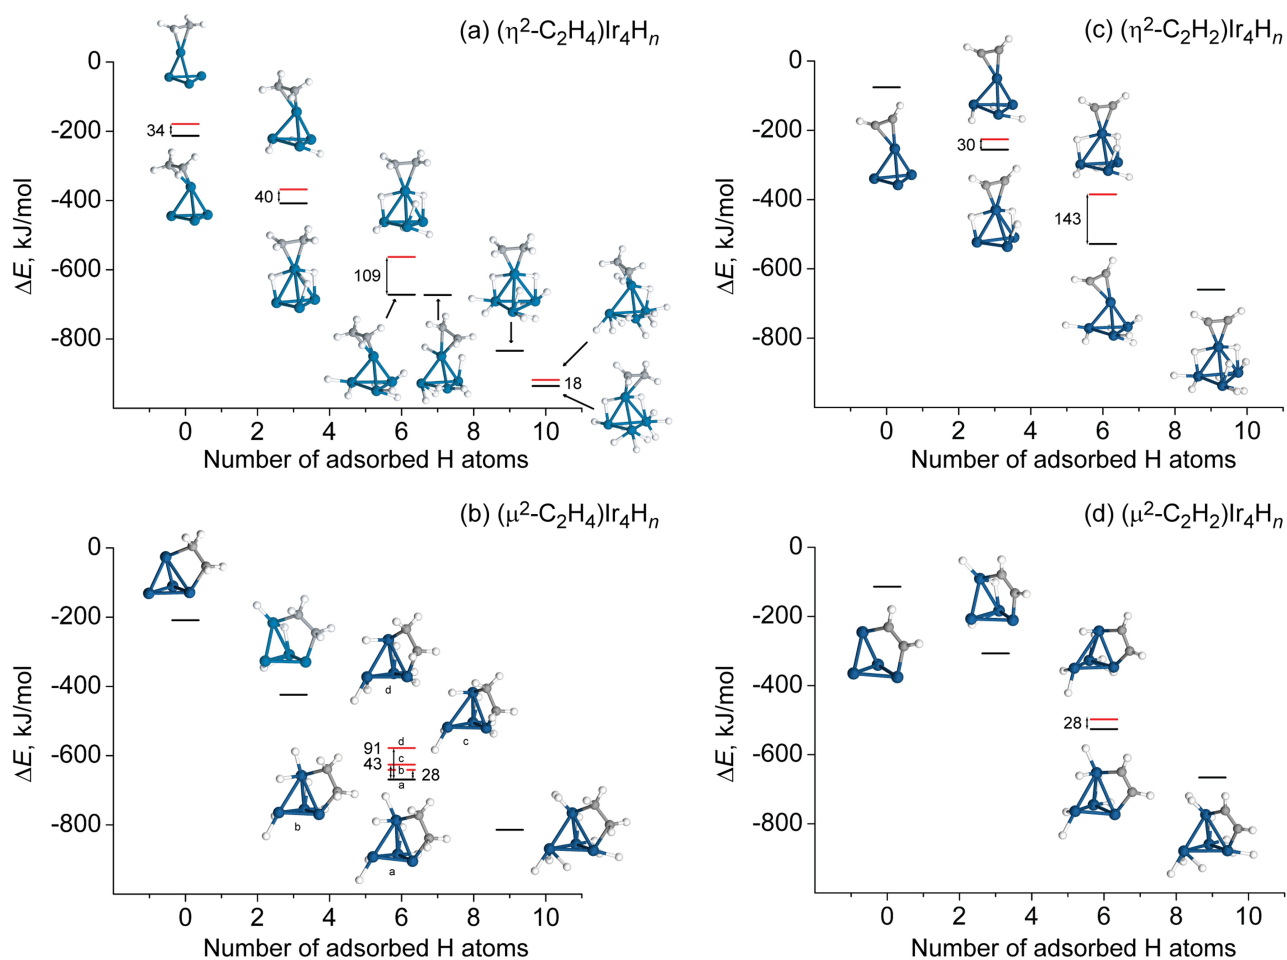

**Figure S1.** Relative stability of different optimized isomers of the complexes obtained by adsorption of ethene and ethyne to bare and hydrogenated  $\text{Ir}_4$  clusters: (a)  $\pi$ -coordinated ethene; (b) di- $\sigma$ -coordinated ethene; (c)  $\pi$ -coordinated ethyne; (d) di- $\sigma$ -coordinated ethyne.

In the series of complexes with di- $\sigma$ -coordinated ethene,  $(\text{di-}\sigma\text{-C}_2\text{H}_4)\text{Ir}_4\text{H}_n$ , different isomers were considered only for the structure with 6 H ligands. The complexes **a** and **b**, on the one hand, and **c** and **d**, on the other, have similar structures but different spin state (see Fig. S1b). The most stable among them is the complex denoted as **a** in which two of the hydrogen ligands are coordinated in on-top mode to one of the iridium atoms connected with the organic ligand while no hydrogen ligand is coordinated to the other iridium center participating in the coordination of the organic molecule. Coordination of a hydrogen atom to each of the iridium atoms involved in the coordination of the organic ligand results in destabilization of the structure by more than 40 kJ/mol.

**Table S1.** Coefficients of the linear functions  $\Delta G = A + B \times k$  ( $k = n + m$ ) showing the dependence of the relative Gibbs free energy of the model complexes  $(C_2H_m)Ir_4H_n$  ( $m = 2-5$ ;  $n = 0, 3, 6, 9$ ) on the total number of H atoms in the system,  $k$ .  $R^2$  is the correlation coefficient obtained at the regression analysis of the linear functions.

| Series                                                                        | A<br>[kJ/mol] | B<br>[kJ/mol per H] | $R^2$ |
|-------------------------------------------------------------------------------|---------------|---------------------|-------|
| $\pi$ -H <sub>2</sub> CH <sub>2</sub> ClIr <sub>4</sub> H <sub>n</sub>        | 98.47         | -67.65              | 0.995 |
| di- $\sigma$ -H <sub>2</sub> CH <sub>2</sub> ClIr <sub>4</sub> H <sub>n</sub> | 74.21         | -64.36              | 0.986 |
| $\pi$ -HCHClIr <sub>4</sub> H <sub>n</sub>                                    | 98.17         | -63.90              | 0.986 |
| di- $\sigma$ -HCHClIr <sub>4</sub> H <sub>n</sub>                             | 34.98         | -58.03              | 0.988 |
| H <sub>3</sub> CH <sub>2</sub> ClIr <sub>4</sub> H <sub>n</sub>               | 108.21        | -63.16              | 0.965 |
| H <sub>3</sub> CClIr <sub>4</sub> H <sub>n</sub>                              |               |                     |       |
| $k \leq 6$                                                                    | 252.36        | -111.17             | 0.999 |
| $k \geq 6$                                                                    | 210.36        | -34.06              | 0.966 |
| H <sub>2</sub> CHClIr <sub>4</sub> H <sub>n</sub>                             | 207.86        | -68.27              | 0.978 |
| H <sub>2</sub> CClIr <sub>4</sub> H <sub>n</sub>                              | 139.42        | -64.73              | 0.965 |

## Determination of the concentrations of the various species formed after H<sub>2</sub> and C<sub>2</sub>H<sub>4</sub> adsorption on an Ir<sub>4</sub> cluster

We provide pertinent information for constructing the thermodynamic model of hydrogen and ethene adsorption on Ir<sub>4</sub>H<sub>n</sub> clusters in the gas phase. Initially the system is considered to comprise a bare Ir<sub>4</sub> cluster, H<sub>2</sub>, and C<sub>2</sub>H<sub>4</sub>. Mainly two main types of adsorption complexes can be formed: Ir<sub>4</sub>H<sub>n</sub> species without an organic ligand and C<sub>2</sub>H<sub>m</sub>Ir<sub>4</sub>H<sub>n</sub> species with an organic ligand of various kinds and coordination modes:

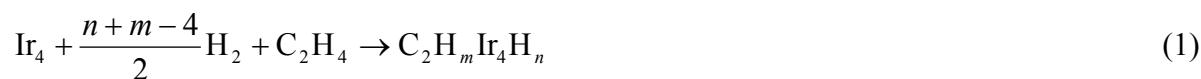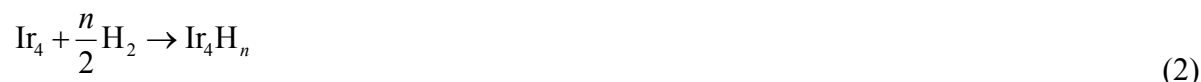

The Gibbs free energy of formation of the hydrogenated Ir<sub>4</sub>H<sub>n</sub> species and the adsorption complexes with an organic ligand can be calculated with respect to Eqs. (1) and (2) as follows:

$$\begin{aligned} \Delta G[n:m] &= [E[n:m] - E[0:0] - E[\text{C}_2\text{H}_4] - yE[\text{H}_2]] + \\ &+ [\text{ZPE}[n:m] - \text{ZPE}[0:0] - \text{ZPE}[\text{C}_2\text{H}_4] - y\text{ZPE}[\text{H}_2]] - \\ &- T \times [S[n:m] - S[0:0] - S[\text{C}_2\text{H}_4] - yS[\text{H}_2]] \\ &= \Delta E[n:m] + \Delta \text{ZPE}[n:m] - T \times \Delta S[n:m] \end{aligned} \quad (3)$$

$$\Delta G[n:0] = \Delta E[n:0] + \Delta \text{ZPE}[n:0] - T \times \Delta S[n:0] \quad (4)$$

The concentrations of the various complexes can be obtained via Eqs. (5) and (6), taking into account that the sum of the concentrations of all Ir<sub>4</sub>-containing species is normalized to one:

$$[n:m] = [0:0] \times K[n:m] \times \left(\frac{P(\text{H}_2)}{RT}\right)^y \times \left(\frac{P(\text{C}_2\text{H}_4)}{RT}\right) \quad (5)$$

$$[n:0] = [0:0] \times K[n:0] \times \left(\frac{P(\text{H}_2)}{RT}\right)^{\frac{n}{2}} \quad (6)$$

$$\sum_{n=0}^{14-m} \sum_{m=2}^5 [n:m] + \sum_{n=0}^{10} [n:0] = 1 \quad (7)$$

$$[0:0] = \left\{ \sum_{n=0}^{14-m} \sum_{m=2}^5 K[n:m] \times \left(\frac{P(\text{H}_2)}{RT}\right)^y \times \left(\frac{P(\text{C}_2\text{H}_4)}{RT}\right) + \sum_{n=0}^{10} K[n:0] \times \left(\frac{P(\text{H}_2)}{RT}\right)^{\frac{n}{2}} \right\}^{-1} \quad (8)$$

In the above equations, we used the following notations:

$$y = \frac{n+m-4}{2}$$

[n:m] – concentration of C<sub>2</sub>H<sub>m</sub>Ir<sub>4</sub>H<sub>n</sub>

[n:0] – concentration of Ir<sub>4</sub>H<sub>n</sub>

[0:0] – concentration of Ir<sub>4</sub>

$$K[n:m] = \exp\{-\Delta G[n:m]/RT\}$$

## Experimental data from IR spectroscopy investigation of ethene / ethyne adsorption on metal surfaces and supported metal clusters

**Table S2.** Experimental vibrational frequencies of ethene or ethene-derived species adsorbed on supported iridium species or iridium surface.

| Catalysts                                                      | IR bands, cm <sup>-1</sup>                                                                                                                                                    | Adsorbate                                                       | Conditions                                                                                             | Ref. |
|----------------------------------------------------------------|-------------------------------------------------------------------------------------------------------------------------------------------------------------------------------|-----------------------------------------------------------------|--------------------------------------------------------------------------------------------------------|------|
| Ir <sub>4</sub> /γ-Al <sub>2</sub> O <sub>3</sub>              | 2988, 2975, 2897, 2884<br>2956, 2933                                                                                                                                          | di-σ-bonded<br>ethene<br>ethyl                                  | 288 K<br>300 Torr H <sub>2</sub><br>40-200 Torr C <sub>2</sub> H <sub>4</sub>                          | 1    |
|                                                                | 2992, 2987, 2896, 2887<br>2957, 2929, 2863<br>3060, 3026<br>2947, 2896                                                                                                        | di-σ-bonded<br>ethene<br>ethyl<br>π-bonded ethene<br>ethylidyne | 288 K<br>300 Torr H <sub>2</sub><br>200-293 Torr<br>C <sub>2</sub> H <sub>4</sub>                      |      |
| Ir <sub>n</sub> /γ-Al <sub>2</sub> O <sub>3</sub> <sup>a</sup> | 1480, 1186<br>2887 [ν <sub>s</sub> (CH <sub>3</sub> )], 1346<br>[δ <sub>s</sub> (CH <sub>3</sub> )]                                                                           | ethene<br>ethylidyne                                            | 90 K<br>300 K                                                                                          | 2    |
|                                                                | 2947, 2896, 2816, 1418,<br>1350, 1156<br>2978, 1504, 1188                                                                                                                     | ethylidyne<br>π-bonded ethene                                   | room temperature                                                                                       |      |
| Ir(111) <sup>c</sup>                                           | 2940 [ν <sub>s</sub> (CH <sub>3</sub> )], 1400<br>[δ <sub>s</sub> (CH <sub>3</sub> )],<br>1165 [ν(CC)], 986 [ρ(CH <sub>3</sub> )],<br>457 [ν <sub>s</sub> (CM)]               | ethylidyne                                                      | 180 K<br>4×10 <sup>-4</sup> Pa s C <sub>2</sub> H <sub>4</sub>                                         | 4    |
|                                                                | 2950 [ν <sub>s</sub> (CH <sub>3</sub> )], 1410<br>[δ <sub>s</sub> (CH <sub>3</sub> )],<br>1600 [ν(CC)], 986 [ρ(CH <sub>3</sub> )],<br>780 [δ(CH)], ~430 [ν <sub>s</sub> (CM)] | ethylidyne                                                      | 180 K<br>5×10 <sup>-4</sup> Pa s C <sub>2</sub> H <sub>2</sub>                                         |      |
| Ir(210) <sup>b</sup>                                           | 3020, 1280, 830                                                                                                                                                               | acetylide (CCH) /<br>polymers                                   | 300→450 K<br>10×10 <sup>-4</sup> Pa s C <sub>2</sub> H <sub>2</sub>                                    | 5    |
|                                                                | 2949, 1441, 791<br>2970, 1448, 1136, 988                                                                                                                                      | acetylide (CCH)<br>ethylidyne                                   | 90 K<br>0.5 langmuir C <sub>2</sub> H <sub>2</sub><br>90 K<br>3 langmuir C <sub>2</sub> H <sub>2</sub> |      |

<sup>a</sup> Particles of ca. 350 Ir atoms. <sup>b</sup> Particle size estimated 1.8 nm (100–150 atoms) by CO titration.

<sup>c</sup> HREELS.

- (1) Argo, A. M.; Odzak, J. F.; Gates, B. C. *J. Am. Chem. Soc.* **2003**, *125*, 7107–7115.
- (2) Frank, M.; Bäumer, M.; Kuhnemuth, R.; Freund H.-J. *J. Vac. Sci. Tech. A* **2001**, *19*, 1497–1501.
- (3) Mohsin, S. B.; Trenary, M.; Robota, H. J. *J. Phys. Chem.* **1991**, *95*, 6657–6661.
- (4) Marinova, Ts. S.; Kostov, K. L. *Surf. Sci.* **1987**, *181*, 573–585.
- (5) Chen, W.; Ermanoski, I.; Wu, Q.; Madey, T. E.; Hwu, H. H.; Chen, J. G. *J. Phys. Chem. B* **2003**, *107*, 5231–5242.

**Table S3.** Comparison between the experimental and theoretical spectra of ethene and ethyne in gas phase and adsorbed on iridium clusters in  $\pi$ - or di- $\sigma$ -mode. The theoretically obtained values have not been corrected; the experimental values for the adsorbed species are from Ref. 1.

| Structure                                      | $\nu(\text{C-H})$                  | $\delta(\text{C-H})$                       | $\nu(\text{C-C})$ |
|------------------------------------------------|------------------------------------|--------------------------------------------|-------------------|
| <i>Experimental values</i>                     |                                    |                                            |                   |
| $\text{C}_2\text{H}_6$                         | 2896, 2954, 2969, 2985             | 289, 822, 1190, 1379, 1388, 1468, 1469     | 995               |
| $\text{C}_2\text{H}_4$                         | 2989, 3026, 3103, 3106             | 826, 943, 949, 1023, 1236, 1342, 1444      | 1623              |
| di- $\sigma$ -bonded ethene                    | 2887, 2896, 2987, 2992             |                                            |                   |
| $\pi$ -bonded ethene                           | 3026, 3060                         |                                            |                   |
| <i>Calculated values</i>                       |                                    |                                            |                   |
| $\text{C}_2\text{H}_6$                         | 2943, 2946, 3003, 3005, 3030, 3034 | 352, 787, 1173, 1333, 1343, 1467, 1468     | 982               |
| $\text{C}_2\text{H}_4$                         | 3037, 3051, 3114, 3144             | 791, 917, 928, 1031, 1196, 1337, 1411      | 1634              |
| $\pi\text{-H}_2\text{CH}_2\text{Clr}_4$        | 2977, 2986, 3079, 3100             | 697, 781, 849, 945, 952, 1177, 1414, 1464  | 1165              |
| di- $\sigma\text{-H}_2\text{CH}_2\text{Clr}_4$ | 2879, 2890, 2947, 2966             | 564, 659, 923, 993, 1064, 1199, 1362, 1387 | 1017              |

**Table S4.** C-H and C-C vibrational frequencies (in  $\text{cm}^{-1}$ ; the theoretically obtained values have not been corrected) in the model adsorption complexes  $\text{C}_2\text{H}_m\text{Ir}_4\text{H}_n$  ( $m = 2 / 4$ ,  $n = 0, 3, 6, 9$ ) of ethene and ethyne.

| Structure                                                    | C-H                    | C-C  | Structure                                  | C-H        | C-C  |
|--------------------------------------------------------------|------------------------|------|--------------------------------------------|------------|------|
| Exp. <sup>a</sup>                                            |                        |      |                                            |            |      |
| $\pi$ -bonded ethene                                         | 3026, 3060             |      |                                            |            |      |
| di- $\sigma$ -bonded ethene                                  | 2887, 2896, 2987, 2992 |      |                                            |            |      |
| Theory                                                       |                        |      |                                            |            |      |
| $\pi$ -bonded ethene                                         |                        |      | $\pi$ -bonded ethyne                       |            |      |
| $\pi$ - $\text{H}_2\text{CH}_2\text{Clr}_4$                  | 2977, 2986, 3079, 3100 | 1165 | $\pi$ - $\text{HCHClr}_4$                  | 3131, 3181 | 1523 |
| $\pi$ - $\text{H}_2\text{CH}_2\text{Clr}_4\text{H}$          | 3002, 3011, 3085, 3111 | 1172 |                                            |            |      |
| $\pi$ - $\text{H}_2\text{CH}_2\text{Clr}_4\text{H}_3$        | 2996, 3007, 3065, 3095 | 1148 | $\pi$ - $\text{HCHClr}_4\text{H}_3$        | 3126, 3171 | 1519 |
| $\pi$ - $\text{H}_2\text{CH}_2\text{Clr}_4\text{H}_6$        | 2990, 3005, 3109, 3129 | 1193 | $\pi$ - $\text{HCHClr}_4\text{H}_6$        | 3164, 3216 | 1569 |
| $\pi$ - $\text{H}_2\text{CH}_2\text{Clr}_4\text{H}_9$        | 3009, 3016, 3081, 3105 | 1155 | $\pi$ - $\text{HCHClr}_4\text{H}_9$        | 3151, 3194 | 1582 |
| $\pi$ - $\text{H}_2\text{CH}_2\text{Clr}_4\text{H}_{10}$     | 3014, 3037, 3103, 3127 | 1198 |                                            |            |      |
| di- $\sigma$ -bonded ethene                                  |                        |      | di- $\sigma$ -bonded ethyne                |            |      |
| di- $\sigma$ - $\text{H}_2\text{CH}_2\text{Clr}_4$           | 2879, 2890, 2947, 2966 | 1017 | di- $\sigma$ - $\text{HCHClr}_4$           | 2912, 2945 | 1306 |
|                                                              |                        |      | di- $\sigma$ - $\text{HCHClr}_4\text{H}_2$ | 2946, 2968 | 1263 |
| di- $\sigma$ - $\text{H}_2\text{CH}_2\text{Clr}_4\text{H}_3$ | 2847, 2864, 2919, 2977 | 951  | di- $\sigma$ - $\text{HCHClr}_4\text{H}_3$ | 2918, 3017 | 1320 |
| di- $\sigma$ - $\text{H}_2\text{CH}_2\text{Clr}_4\text{H}_6$ | 2775, 2917, 2929, 3020 | 952  | di- $\sigma$ - $\text{HCHClr}_4\text{H}_6$ | 2944, 3036 | 1341 |
| di- $\sigma$ - $\text{H}_2\text{CH}_2\text{Clr}_4\text{H}_9$ | 2909, 2922, 3032, 3052 | 982  | di- $\sigma$ - $\text{HCHClr}_4\text{H}_9$ | 3033, 3063 | 1367 |

<sup>a</sup> The experimental data are obtained in the investigation of ethene hydrogenation on  $\text{Ir}_4/\gamma\text{-Al}_2\text{O}_3$  ( $\text{H}_2$  pressure 300 Torr,  $\text{C}_2\text{H}_4$  pressure 200–293 Torr), reported by Argo et al. The assignment of the bands in the experimental spectra is based on comparison with the vibrational modes of the corresponding molecules or fragments adsorbed on crystal metal surfaces.

**Table S5.** C-H and C-C vibrational frequencies (in  $\text{cm}^{-1}$ ; the theoretically obtained values have not been corrected) in the model complexes  $\text{C}_2\text{H}_m\text{Ir}_4\text{H}_n$  ( $m = 2 / 4$ ,  $n = 0, 3, 6, 9$ ) of ethyl, ethylidyne, vinyl, and vinylidene.

| Structure                                         | CH <sub>2</sub> | CH <sub>3</sub>  | C-C | Structure                         | CH                                               | CH <sub>2</sub> | C-C        |
|---------------------------------------------------|-----------------|------------------|-----|-----------------------------------|--------------------------------------------------|-----------------|------------|
| Exp. <sup>a</sup>                                 |                 |                  |     |                                   |                                                  |                 |            |
| ethyl                                             | 2863            | 2929, 2957       |     |                                   |                                                  |                 |            |
| ethylidene                                        |                 | 2896, 2947       |     |                                   |                                                  |                 |            |
| ethyl                                             |                 |                  |     | vinyl                             |                                                  |                 |            |
|                                                   |                 |                  |     | H <sub>2</sub> CHClr <sub>4</sub> | 2869                                             | 2898, 2959      | 1026       |
| H <sub>3</sub> CH <sub>2</sub> Clr <sub>4</sub> H | 2850, 2899      | 2931, 3008, 3038 |     | 993                               | H <sub>2</sub> CHClr <sub>4</sub> H <sub>3</sub> | 2815            | 2907, 2965 |
| 3                                                 |                 |                  |     |                                   |                                                  |                 |            |
| H <sub>3</sub> CH <sub>2</sub> Clr <sub>4</sub> H | 2863, 2928      | 2934, 3010, 3038 |     | 994                               | H <sub>2</sub> CHClr <sub>4</sub> H <sub>6</sub> | 2969            | 2911, 2994 |
| 6                                                 |                 |                  |     |                                   |                                                  |                 |            |
| H <sub>3</sub> CH <sub>2</sub> Clr <sub>4</sub> H | 2915, 2978      | 2922, 2993, 3022 |     | 982                               | H <sub>2</sub> CHClr <sub>4</sub> H <sub>9</sub> | 2927            | 2881, 2997 |
| 9                                                 |                 |                  |     |                                   |                                                  |                 |            |
| ethylidyne                                        |                 |                  |     | vinylidene                        |                                                  |                 |            |
| H <sub>3</sub> CClr <sub>4</sub>                  |                 | 2936, 3015, 3016 |     | 1115                              | H <sub>2</sub> CClr <sub>4</sub>                 | 2996, 3081      |            |
| H <sub>3</sub> CClr <sub>4</sub> H                |                 | 2941, 3021, 3029 |     | 1097                              | H <sub>2</sub> CClr <sub>4</sub> H <sub>3</sub>  | 3014, 3108      |            |
| H <sub>3</sub> CClr <sub>4</sub> H <sub>2</sub>   |                 | 2933, 3009, 3017 |     | 1093                              | H <sub>2</sub> CClr <sub>4</sub> H <sub>6</sub>  | 3011, 3108      |            |
| H <sub>3</sub> CClr <sub>4</sub> H <sub>3</sub>   |                 | 2935, 3012, 3019 |     | 1103                              | H <sub>2</sub> CClr <sub>4</sub> H <sub>9</sub>  | 3004, 3093      |            |
| H <sub>3</sub> CClr <sub>4</sub> H <sub>4</sub>   |                 | 2931, 3011, 3015 |     | 1114                              |                                                  |                 |            |
| H <sub>3</sub> CClr <sub>4</sub> H <sub>6</sub>   |                 | 2936, 3013, 3042 |     | 1134                              |                                                  |                 |            |
| H <sub>3</sub> CClr <sub>4</sub> H <sub>9</sub>   |                 | 2934, 3002, 3029 |     | 1163                              |                                                  |                 |            |

<sup>a</sup>The experimental data are obtained in the investigation of ethene hydrogenation on Ir<sub>4</sub>/γ-Al<sub>2</sub>O<sub>3</sub> (H<sub>2</sub> pressure 300 Torr, C<sub>2</sub>H<sub>4</sub> pressure 200–293 Torr), reported by Argo et al. The assignment of the bands in the experimental spectra is based on comparison with the vibrational modes of the corresponding molecules or fragments adsorbed on crystal metal surfaces.



## S2. Electronic structure of $(C_2H_m)Ir_4H_n$ adsorption complexes.

**Table S6.** Characteristics of the electronic structure of iridium atoms in the model adsorption complexes  $(C_2H_m)Ir_4$  ( $m = 2, 3, 4$ ). Bold values correspond to iridium atoms to which the organic ligand is coordinated.

|                           | $\pi-C_2H_4$ | di- $\sigma-C_2H_4$ | $\pi-C_2H_2$ | di- $\sigma-C_2H_2$ | $H_3CC\equiv$ | $H_2CHC-$   | $H_2CC=$    |
|---------------------------|--------------|---------------------|--------------|---------------------|---------------|-------------|-------------|
| $\Delta E(Ir\ 4f)^a$      |              |                     |              |                     |               |             |             |
| Ir1                       | <b>0.83</b>  | <b>0.82</b>         | <b>1.44</b>  | <b>0.73</b>         | <b>0.60</b>   | <b>1.10</b> | <b>1.02</b> |
| Ir2                       | 0.13         | <b>0.85</b>         | 0.18         | <b>0.71</b>         | <b>0.60</b>   | <b>0.84</b> | <b>1.23</b> |
| Ir3                       | 0.13         | 0.54                | 0.19         | 0.55                | <b>0.60</b>   | <b>0.65</b> | <b>0.89</b> |
| Ir4                       | -0.15        | 0.53                | 0.19         | 0.57                | 0.73          | 0.77        | 0.51        |
| $\langle Ir \rangle^b$    | 0.04         | 0.53                | 0.18         | 0.56                | 0.73          | 0.77        | 0.51        |
| $\langle Ir(C) \rangle^b$ | <b>0.83</b>  | <b>0.83</b>         | <b>1.44</b>  | <b>0.72</b>         | <b>0.60</b>   | <b>0.86</b> | <b>1.05</b> |
| PDC <sup>c</sup>          |              |                     |              |                     |               |             |             |
| Ir1                       | <b>0.30</b>  | <b>0.10</b>         | <b>0.51</b>  | <b>0.33</b>         | <b>0.06</b>   | <b>0.09</b> | <b>0.18</b> |
| Ir2                       | 0.11         | <b>0.06</b>         | 0.04         | <b>0.32</b>         | <b>0.09</b>   | <b>0.03</b> | <b>0.25</b> |
| Ir3                       | 0.10         | 0.03                | 0.03         | 0.01                | <b>0.06</b>   | <b>0.08</b> | <b>0.28</b> |
| Ir4                       | -0.07        | 0.06                | 0.09         | 0.00                | 0.05          | -0.02       | -0.08       |
| $\langle Ir \rangle^b$    | 0.05         | 0.04                | 0.05         | 0.01                | 0.05          | -0.02       | -0.08       |
| $\langle Ir(C) \rangle$   | <b>0.30</b>  | <b>0.08</b>         | <b>0.51</b>  | <b>0.32</b>         | <b>0.07</b>   | <b>0.07</b> | <b>0.24</b> |

<sup>a</sup> Shift of the average energy (in eV) of the Ir 4f core levels with respect to the bare cluster  $Ir_4$ . <sup>b</sup> Corresponding characteristics averaged over Ir atoms, not interacting with the organic ligand, or over Ir(C) atoms, interacting with the organic ligand. <sup>c</sup> Potential-derived charges of iridium atoms (in e).
